# Supplementary material for: Overestimation of establishment success of non-native birds in Hawaii and Britain
Source: Springer Nature journal article supplement (doi:10.1007/s10530-012-0285-y), 2012-07-12
Supplement: MOESM1 [file 10530_2012_285_MOESM1_ESM.pdf]

## Appendix A

**Table 1:** List of non-native bird species that have established self-sustaining populations in the Hawaiian Islands at least 15 years.

| COMMON NAME                 | SCIENTIFIC NAME                  | Ni'ihau | Kaua'i | O'ahu | Moloka'i | Lana'i | Kaho'olawe | Maui | Hawai'i |
|-----------------------------|----------------------------------|---------|--------|-------|----------|--------|------------|------|---------|
| <b>ANATIDAE</b>             |                                  |         |        |       |          |        |            |      |         |
| Hawaiian Goose              | <i>Branta sandvicensis</i>       |         | x      | x     | x        |        |            |      |         |
| Mallard                     | <i>Anas platyrhynchos</i>        |         | x      |       |          | x      |            | x    | x       |
| <b>ODONTOPHORIDAE</b>       |                                  |         |        |       |          |        |            |      |         |
| California Quail            | <i>Callipepla californica</i>    | x       | x      |       | x        |        |            | x    | x       |
| Gambel Quail                | <i>Callipepla gambelii</i>       |         |        |       |          | x      | x          |      | x       |
| <b>PHASIANIDAE</b>          |                                  |         |        |       |          |        |            |      |         |
| Chukar                      | <i>Alectoris chukar</i>          |         | x      |       | x        | x      |            | x    | x       |
| Gray Francolin              | <i>Francolinus pondicerianus</i> |         | x      | x     | x        | x      |            | x    | x       |
| Black Francolin             | <i>Francolinus francolinus</i>   | x       | x      | x     | x        | x      |            | x    | x       |
| Erckel Francolin            | <i>Francolinus erckelii</i>      |         | x      | x     | x        | x      |            | x    | x       |
| Japanese Quail              | <i>Coturnix japonica</i>         | x       | x      | x     | x        | x      |            | x    | x       |
| Red Junglefowl              | <i>Gallus gallus</i>             | x       | x      |       |          | x      |            |      |         |
| Kalij Pheasant              | <i>Lophura leucomelanos</i>      |         |        |       |          |        |            |      | x       |
| Ring-necked Pheasant        | <i>Phasianus colchicus</i>       | x       | x      | x     | x        | x      | x          | x    | x       |
| Common Peafowl              | <i>Pavo cristatus</i>            | x       | x      | x     |          |        |            | x    | x       |
| Wild Turkey                 | <i>Meleagris gallopavo</i>       | x       |        |       | x        | x      |            | x    | x       |
| <b>ARDEIDAE</b>             |                                  |         |        |       |          |        |            |      |         |
| Cattle Egret                | <i>Bubulcus ibis</i>             | x       | x      | x     | x        | x      | x          | x    | x       |
| <b>PTEROCLIDIDAE</b>        |                                  |         |        |       |          |        |            |      |         |
| Chestnut-bellied Sandgrouse | <i>Pterocles exustus</i>         |         |        |       |          |        |            |      | x       |
| <b>COLUMBIDAE</b>           |                                  |         |        |       |          |        |            |      |         |
| Rock Pigeon                 | <i>Columba livia</i>             |         | x      | x     | x        | x      | x          | x    | x       |
| Spotted Dove                | <i>Streptopelia chinensis</i>    | x       | x      | x     | x        | x      | x          | x    | x       |
| Zebra Dove                  | <i>Geopelia striata</i>          | x       | x      | x     | x        | x      | x          | x    | x       |
| Mourning Dove               | <i>Zenaida macroura</i>          |         | x      | x     | x        |        | x          | x    | x       |
| <b>PSITTACIDAE</b>          |                                  |         |        |       |          |        |            |      |         |
| Pale-headed Rosella         | <i>Platycercus adscitus</i>      |         |        |       |          |        |            |      |         |
| Rose-ringed Parakeet        | <i>Psittacula krameri</i>        |         | x      | x     |          |        |            |      | x       |
| Mitred Parakeet             | <i>Aratinga mitrata</i>          |         |        |       |          |        |            | x    |         |

|                                  |                              |   |   |   |   |   |   |   |   |   |   |
|----------------------------------|------------------------------|---|---|---|---|---|---|---|---|---|---|
| Red-masked Parakeet              | <i>Aratinga erythroga</i>    |   |   |   |   |   |   |   |   |   | x |
| Red-crowned Parrot               | <i>Amazona viridigenalis</i> |   |   |   |   |   |   |   |   |   | x |
| <b>TYTONIDAE</b>                 |                              |   |   |   |   |   |   |   |   |   |   |
| Barn Owl                         | <i>Tyto alba</i>             | x | x | x | x | x | x | x | x | x | x |
| <b>APODIDAE</b>                  |                              |   |   |   |   |   |   |   |   |   |   |
| Mariana Swiftlet                 | <i>Aerodramus bartschi</i>   |   |   |   |   |   |   |   |   |   | x |
| <b>ALAUDIDAE</b>                 |                              |   |   |   |   |   |   |   |   |   |   |
| Sky Lark                         | <i>Alauda arvensis</i>       | x | x | x | x | x | x | x | x | x | x |
| <b>PYCNONOTIDAE</b>              |                              |   |   |   |   |   |   |   |   |   |   |
| Red-vented Bulbul                | <i>Pycnonotus cafer</i>      |   |   |   |   |   |   |   |   |   | x |
| Red-whiskered Bulbul             | <i>Pycnonotus jocosus</i>    |   |   |   |   |   |   |   |   |   | x |
| <b>SYLVIIDAE</b>                 |                              |   |   |   |   |   |   |   |   |   |   |
| Japanese Bush-Warbler            | <i>Cettia diphone</i>        |   | x | x | x | x | x | x | x | x | x |
| <b>MUSCICAPIDAE</b>              |                              |   |   |   |   |   |   |   |   |   |   |
| White-rumped Shama               | <i>Copsychus malabaricus</i> | x | x | x | x | x |   |   |   |   |   |
| <b>TIMALIIDAE</b>                |                              |   |   |   |   |   |   |   |   |   |   |
| Greater Necklaced Laughingthrush | <i>Garrulax pectoralis</i>   |   | x |   |   |   |   |   |   |   |   |
| Hwamei                           | <i>Leucodioptron canorum</i> |   |   |   |   |   | x |   |   |   |   |
| Red-billed Leiothrix             | <i>Leiothrix lutea</i>       |   |   |   | x | x |   |   |   | x | x |
| <b>ZOSTROPIDAE</b>               |                              |   |   |   |   |   |   |   |   |   |   |
| Japanese White-eye               | <i>Zosterops japonicus</i>   | x | x | x | x | x | x | x | x | x | x |
| <b>MIMIDAE</b>                   |                              |   |   |   |   |   |   |   |   |   |   |
| Northern Mockingbird             | <i>Mimus polyglottos</i>     | x | x | x | x | x | x | x | x | x | x |
| <b>STURNIDAE</b>                 |                              |   |   |   |   |   |   |   |   |   |   |
| Common Myna                      | <i>Acridotheres tristis</i>  | x | x | x | x | x | x | x | x | x | x |
| <b>EMBERIZIDAE</b>               |                              |   |   |   |   |   |   |   |   |   |   |
| Yellow-faced Grassquit           | <i>Tiaris olivaceus</i>      |   |   |   |   |   |   |   |   |   | x |
| Saffron Finch                    | <i>Sicalis flaveola</i>      |   | x | x |   |   |   |   |   |   | x |
| Red-crested Cardinal             | <i>Paroaria coronata</i>     | x | x | x | x | x | x | x | x | x | x |
| Yellow-billed Cardinal           | <i>Paroaria capitata</i>     |   |   |   |   |   |   |   |   |   | x |
| <b>CARDINALIDAE</b>              |                              |   |   |   |   |   |   |   |   |   |   |
| Northern Cardinal                | <i>Cardinalis cardinalis</i> | x | x | x | x | x | x | x | x | x | x |
| <b>ICTERIDAE</b>                 |                              |   |   |   |   |   |   |   |   |   |   |
| Western Meadowlark               | <i>Sturnella neglecta</i>    |   | x |   |   |   |   |   |   |   |   |
| <b>FRINGILLIDAE</b>              |                              |   |   |   |   |   |   |   |   |   |   |
| House Finch                      | <i>Carpodacus mexicanus</i>  | x | x | x | x | x | x | x | x | x | x |

|                        |                              |   |   |   |   |   |   |   |   |   |   |   |
|------------------------|------------------------------|---|---|---|---|---|---|---|---|---|---|---|
| Yellow-fronted Canary  | <i>Serinus mozambicus</i>    |   |   |   |   | x |   |   |   |   |   | x |
| <b>PASSERIDAE</b>      |                              |   |   |   |   |   |   |   |   |   |   |   |
| House Sparrow          | <i>Passer domesticus</i>     | x | x | x | x | x | x | x | x | x | x | x |
| <b>ESTRILIDAE</b>      |                              |   |   |   |   |   |   |   |   |   |   |   |
| Red-cheeked Cordonbleu | <i>Uraeginthus bengalus</i>  |   |   |   |   |   |   |   |   |   |   | x |
| Lavender Waxbill       | <i>Estrilda caerulescens</i> |   |   |   |   |   |   |   |   |   |   | x |
| Orange-cheeked Waxbill | <i>Estrilda melpoda</i>      |   |   |   |   |   |   |   |   |   |   | x |
| Black-rumped Waxbill   | <i>Estrilda troglodytes</i>  |   |   |   |   |   |   |   |   |   |   | x |
| Common Waxbill         | <i>Estrilda astrild</i>      |   |   | x | x | x |   |   |   |   | x | x |
| Red Avadavat           | <i>Amandava amandava</i>     | x | x | x |   |   |   |   |   |   | x | x |
| African Silverbill     | <i>Lonchura cantans</i>      | x | x | x | x |   | x | x | x |   | x | x |
| Nutmeg Mannikin        | <i>Lonchura punctulata</i>   | x | x | x | x |   | x | x | x |   | x | x |
| Chestnut Munia         | <i>Lonchura atricapilla</i>  |   |   | x | x |   |   |   |   |   | x |   |
| Java Sparrow           | <i>Padda oryzivora</i>       |   |   | x | x | x |   | x |   |   | x | x |

**Table 2:** List of non-native bird species reported in Hawaiian islands for which viable populations were never established in the wild.

| COMMON NAME                  | SCIENTIFIC NAME               | Ni'ihau | Kaua'i | O'ahu | Moloka'i | Lana'i | Kaho'olawe | Maui | Hawai'i |
|------------------------------|-------------------------------|---------|--------|-------|----------|--------|------------|------|---------|
| <b>TINAMIDAE</b>             |                               |         |        |       |          |        |            |      |         |
| Chilean Tinamou              | <i>Nothoprocta perdicaria</i> |         | x      |       |          |        |            |      | x       |
| <b>ANATIDAE</b>              |                               |         |        |       |          |        |            |      |         |
| White-faced Whistling-Duck   | <i>Dendrocygna viduata</i>    |         | x      |       |          |        |            |      |         |
| Black-bellied Whistling-Duck | <i>Dendrocygna autumnalis</i> |         | x      |       |          |        |            |      |         |
| Mute Swan                    | <i>Cygnus olor</i>            |         | x      |       |          |        |            |      | x       |
| Black Swan                   | <i>Cygnus atratus</i>         |         | x      | x     |          |        |            | x    |         |
| Swan Goose                   | <i>Anser cygnoides</i>        |         |        |       |          |        |            | x    |         |
| Graylag Goose                | <i>Anser anser</i>            |         |        | x     |          |        |            | x    | x       |
| Egyptian Goose               | <i>Alopochen aegyptiacus</i>  |         | x      |       |          |        |            |      |         |
| Ruddy Shelduck               | <i>Tadorna ferruginea</i>     |         | x      |       |          |        |            |      |         |
| Common Shelduck              | <i>Tadorna tadorna</i>        |         |        | x     |          |        |            |      |         |
| Radjah Shelduck              | <i>Tadorna radjah</i>         |         |        |       |          |        |            |      | x       |
| Muscovy Duck                 | <i>Cairina moschata</i>       |         | x      | x     | x        |        |            | x    | x       |
| Wood Duck                    | <i>Aix sponsa</i>             |         | x      | x     |          |        |            |      | x       |
| Mandarin Duck                | <i>Aix galericulata</i>       |         |        | x     |          |        |            |      | x       |

|                          |                                       |   |   |  |   |   |   |  |   |   |
|--------------------------|---------------------------------------|---|---|--|---|---|---|--|---|---|
| Maned Duck               | <i>Chenonetta jubata</i>              |   |   |  |   |   | x |  |   |   |
| Chiloe Wigeon            | <i>Anas sibilatrix</i>                |   |   |  |   |   | x |  |   | x |
| Rosy-bellied Pochard     | <i>Netta peposaca</i>                 |   |   |  |   |   | x |  |   |   |
| <b>CRACIDAE</b>          |                                       |   |   |  |   |   |   |  |   |   |
| Gray-head Chachalaca     | <i>Ortalis cineieiceps</i>            |   |   |  |   |   |   |  |   | x |
| Crested Guan             | <i>Penelope purpurascens</i>          |   |   |  |   |   |   |  |   | x |
| Great Curassow           | <i>Crax rubra</i>                     |   |   |  |   |   |   |  |   | x |
| <b>ODONTOPHORIDAE</b>    |                                       |   |   |  |   |   |   |  |   |   |
| Mountain Quail           | <i>Oreortyx pictus</i>                |   | x |  |   |   | x |  | x | x |
| Scaled Quail             | <i>Callipepla squamata</i>            |   |   |  |   |   |   |  |   | x |
| Elegant Quail            | <i>Callipepla douglasii</i>           |   |   |  |   |   |   |  |   | x |
| Northern Bobwhite        | <i>Colinus virginianus</i>            |   | x |  |   | x |   |  | x | x |
| Montezuma Quail          | <i>Cyrtonyx montezumae</i>            |   |   |  |   |   |   |  |   | x |
| <b>PHASINIDAE</b>        |                                       |   |   |  |   |   |   |  |   |   |
| Barbaray Partridge       | <i>Alectoris barbara</i>              |   |   |  |   |   | x |  | x | x |
| See-see Partridge        | <i>Ammoperdix grisgeogularis</i>      |   |   |  |   |   |   |  |   | x |
| Chinese Francolin        | <i>Fraucolinus pintadeanus</i>        |   |   |  |   |   |   |  |   | x |
| Heuglin Francolin        | <i>Fraucolinus icterorhynchus</i>     |   |   |  |   |   |   |  |   | x |
| Clapperton Francolin     | <i>Fraucolinus clappertoni</i>        |   |   |  |   |   |   |  | x | x |
| Red-billed Francolin     | <i>Fraucolinus adsperus</i>           |   |   |  |   |   |   |  |   | x |
| Yellow-necked Francolin  | <i>Fraucolinus leucoscepus</i>        |   |   |  |   |   |   |  | x | x |
| Gray Partridge           | <i>Perdix perdix</i>                  | x |   |  | x | x |   |  | x | x |
| Stubble Quail            | <i>Coturnix pectoralis</i>            |   |   |  |   |   |   |  | x |   |
| Blue-breasted Quail      | <i>Coturnix chinensis</i>             |   | x |  |   | x |   |  | x | x |
| Crested Partridge        | <i>Rollulus rouloul</i>               |   |   |  |   |   |   |  | x |   |
| Chinese Bamboo-Partridge | <i>Bambusicola thorcica</i>           |   |   |  |   |   |   |  | x | x |
| Gray Junglefowl          | <i>Gallus soneratii</i>               |   |   |  |   |   |   |  |   | x |
| Silver Pheasant          | <i>Lophura nycthemera</i>             |   | x |  |   | x |   |  |   |   |
| Copper Pheasant          | <i>Syrmaticus soemmerringii</i>       |   | x |  |   | x |   |  | x |   |
| Reeves Pheasant          | <i>Syrmaticus reevesii</i>            |   | x |  |   | x |   |  | x | x |
| Golden Pheasant          | <i>Chrysolophus pictus</i>            |   | x |  |   | x |   |  | x |   |
| Lady Amherst Pheasant    | <i>Chrysolophus amherstiae</i>        |   |   |  |   |   |   |  |   |   |
| Sharp-tailed Grouse      | <i>Tympannuchus phasianellus</i>      |   |   |  |   |   |   |  |   | x |
| Lesser Prairie-chicken   | <i>Tympannuchus pallidicinctus</i>    | x |   |  |   |   |   |  |   |   |
| Mongolian Pheasant       | <i>Phasianus colchicus mongolicus</i> |   |   |  |   |   |   |  |   |   |
| Prairie chicken          | <i>Tympannuchus cupido</i>            |   | x |  |   | x |   |  |   |   |

|                          |                                 |   |   |   |   |   |   |
|--------------------------|---------------------------------|---|---|---|---|---|---|
| Helmeted Guineafowl      | <i>Numida melagris</i>          | x | x | x | x | x | x |
| <b>TURNICIDAE</b>        |                                 |   |   |   |   |   |   |
| Painted Buttonquail      | <i>Turnix varia</i>             |   |   |   | x |   | x |
| <b>PHOENICOPTERIDAE</b>  |                                 |   |   |   |   |   |   |
| American Flamingo        | <i>Phoenicopterus ruber</i>     | x |   |   |   |   |   |
| <b>RALLIDAE</b>          |                                 |   |   |   |   |   |   |
| Purple Swamphen          | <i>Porphyrio porphyrio</i>      |   | x |   |   |   | x |
| <b>COLUMBIDAE</b>        |                                 |   |   |   |   |   |   |
| Speckled Pigeo           | <i>Columba guinea</i>           |   |   |   |   |   | x |
| Ringed Turtle-Dove       | <i>Streptopelia roseogrisa</i>  |   | x |   |   |   | x |
| Eurasia Collared-Dove    | <i>Streptopelia decaocto</i>    | x | x |   |   | x | x |
| Emerald Dove             | <i>Chalcophaps indica</i>       |   | x |   |   |   |   |
| Common Bronzewing        | <i>Phaps chalcoptera</i>        |   | x |   |   |   |   |
| Crested Pigeon           | <i>Geophaps lophotes</i>        |   | x | x | x |   | x |
| Spinifex Pigeon          | <i>Geophaps plumifera</i>       |   |   |   | x |   | x |
| Partridge Pigeon         | <i>Geophaps smithii</i>         |   |   |   | x |   | x |
| Diamond Dove             | <i>Geopelia cuneata</i>         |   | x |   | x |   |   |
| Peaceful Dove            | <i>Geopelia placida</i>         | x | x | x | x |   |   |
| Bar-shouldered Dove      | <i>Geopelia humeralis</i>       | x | x | x |   | x |   |
| Wonga Pigeon             | <i>Leocusaricia melanoleuca</i> |   |   |   | x |   | x |
| White-winged Dove        | <i>Zenaida asiatica</i>         |   |   |   |   |   | x |
| White-tipped Dove        | <i>Leptotelia verreauxi</i>     |   |   |   |   |   | x |
| Ruddy Quail-Dove         | <i>Geotrygon montana</i>        |   |   |   |   | x |   |
| Nicobar Pigeon           | <i>Caloenas nicobarica</i>      | x |   |   |   | x |   |
| Luzon Bleeding-hear      | <i>Gallicolumba luzonica</i>    | x |   |   |   |   |   |
| <b>CACATUIDAE</b>        |                                 |   |   |   |   |   |   |
| Palm Cockatoo            | <i>Probosciger aterrimus</i>    |   | x |   |   |   |   |
| Tanimbar Cockatoo        | <i>Cacatua goffini</i>          |   | x |   |   |   |   |
| Yellow-crested Cockatoo  | <i>Cacatua sulphurea</i>        |   | x |   |   |   |   |
| Sulphur-crested Cockatoo | <i>Cacatua galerita</i>         |   | x |   |   | x |   |
| Salmon-crested Cockatoo  | <i>Cacatua moluccensis</i>      |   | x |   |   | x |   |
| White Cockatoo           | <i>Cacatua alba</i>             |   | x |   |   |   |   |
| Galah                    | <i>Eolophus roseiacapillus</i>  |   |   |   |   |   |   |
| Cocktiel                 | <i>Nymphicus hollandicus</i>    |   | x | x |   |   |   |
| <b>PSITTACIDAE</b>       |                                 |   |   |   |   |   |   |
| Red-fronted Parakeet     | <i>Cyanoramphus</i>             |   | x |   |   |   |   |

|                           |                                                     |   |   |   |   |
|---------------------------|-----------------------------------------------------|---|---|---|---|
|                           | <i>novaezeandia</i>                                 |   |   |   |   |
| Budgerigar                | <i>Melopsittacus undulates</i>                      |   | x |   | x |
| Plum-headed Parakee       | <i>Psittacus cyanocephala</i>                       |   |   |   | x |
| Rosy-faced Lovebird       | <i>Agapornis roseicollis</i>                        | x | x |   | x |
| Senegal Parrot            | <i>Poicephalus senegalus</i>                        | x | x |   | x |
| Meyer Parrot              | <i>Poicephalus meyeri</i>                           | x |   |   |   |
| Blue-and-yellow Macaw     | <i>Ara ararauna</i>                                 |   | x |   | x |
| Military Macaw            | <i>Ara militaris</i>                                |   |   | x |   |
| Scarlet Macaw             | <i>Ara macao</i>                                    |   | x |   |   |
| Blue-crowned Parakeet     | <i>Aratinga acuticaudata</i>                        |   | x |   |   |
| Scarlet-fronted Parakeet  | <i>Aratinga wagleri</i>                             |   |   |   | x |
| Jandaya Parakeet          | <i>Aratinga jandaya</i>                             |   | x |   |   |
| Burrowing Parrot          | <i>Cyanoliseus patagonicus</i>                      |   |   |   | x |
| Monk Parakeet             | <i>Myiopsitta monachus</i>                          |   | x |   |   |
| Nanday Parakeet           | <i>Nandayus nenday</i>                              |   | x |   |   |
| Orange-chinned Parakeet   | <i>Brotogeris jugularis</i>                         |   | x |   |   |
| White-fronted Parrot      | <i>Amazona albifrons</i>                            |   | x |   | x |
| Red-lored Parrot          | <i>Amazona autunalis</i>                            |   | x |   |   |
| <b>CORVIDAE</b>           |                                                     |   |   |   |   |
| Blue Magpie               | <i>Urocissa erythrorhyncha</i>                      |   | x |   |   |
| <b>MONORCHIDAE</b>        |                                                     |   |   |   |   |
| Willie-wagtail            | <i>Rhipidura leucophrys</i>                         |   | x |   |   |
| <b>PYCNONOTIDAE</b>       |                                                     |   |   |   |   |
| White-cheeked Bulbul      | <i>Pycnonotus leucogenys</i>                        | x |   |   |   |
| <b>NECTARINIIDAE</b>      |                                                     |   |   |   |   |
| Sunbird sp                | <i>Chalcoparia singalensis/Antreptes malacensis</i> |   | x |   |   |
| <b>GRALLINIDAE</b>        |                                                     |   |   |   |   |
| Magpie-Lark               | <i>Grallina cyanoleuca</i>                          | x | x |   | x |
| <b>MUSCICAPIDAE</b>       |                                                     |   |   |   |   |
| Blue-and-white Flycatcher | <i>Cyanoptila cyanomelana</i>                       |   | x |   | x |
| Oriental Magpie-Robin     | <i>Copsychus saularis</i>                           | x | x |   |   |
| <b>TURDIDAE</b>           |                                                     |   |   |   |   |
| Japanese Robin            | <i>Erithacus akahige</i>                            |   | x |   |   |
| Ryuku Robin               | <i>Erithacus komadori</i>                           |   | x |   |   |
| Chinese thrush            | <i>Turdus mupinensis</i>                            |   | x |   |   |
| <b>TIMALIIDAE</b>         |                                                     |   |   |   |   |

|                               |                                  |   |   |   |
|-------------------------------|----------------------------------|---|---|---|
| White-crested Laughingthrush  | <i>Garrulax leucolophus</i>      |   | x |   |
| Black-throated Laughingthrush | <i>Garrulax chinensis</i>        | x | x |   |
| <b>STURNIDAE</b>              |                                  |   |   |   |
| Hill Myna                     | <i>Gracula religiosa</i>         |   | x |   |
| <b>EMBERIZIDAE</b>            |                                  |   |   |   |
| Yellow Cardinal               | <i>Gubernatrix cristata</i>      |   | x | x |
| Red-cowled Cardinal           | <i>Paroraria dominicana</i>      |   | x | x |
| <b>CARDINALIDAE</b>           |                                  |   |   |   |
| Indigo Bunting                | <i>Passerina cyanea</i>          |   | x | x |
| Orange-breasted Bunting       | <i>Passerina leclancherii</i>    |   | x | x |
| Painted Bunting               | <i>Passerina ciris</i>           |   | x | x |
| <b>ICTERIDAE</b>              |                                  |   |   |   |
| Red-breasted Blackbird        | <i>Sturnella militaris</i>       | x |   |   |
| <b>FINGILLIDAE</b>            |                                  |   |   |   |
| White-rumped Seedeater        | <i>Serinus leucopygius</i>       |   | x | x |
| <b>PLOCEIIDAE</b>             |                                  |   |   |   |
| African Masked-Weaver         | <i>Ploceus velatus</i>           |   |   | x |
| Baya Weaver                   | <i>Ploceus philippinus</i>       |   | x |   |
| Yellow-crowned Bishop         | <i>Euplectis afer</i>            |   | x | x |
| Red Bishop                    | <i>Euplectis orix</i>            |   | x | x |
| <b>ESTRILIDAE</b>             |                                  |   |   |   |
| Blue-breasted Cordonbleu      | <i>Uraeginthus angolensis</i>    |   | x |   |
| Blue-capped Cordonbleu        | <i>Uraeginthus cyanocephalus</i> |   | x |   |
| Diamond Firetail              | <i>Stagonopleura guttata</i>     |   | x |   |
| African Firefinch             | <i>Lagonosticta rubricata</i>    |   | x | x |
| White-rumped Munia            | <i>Lonchura striata</i>          |   |   | x |
| Tricolored Munia              | <i>Lonchura malacca</i>          |   | x |   |
| Village Indigobird            | <i>Vidua chalybeata</i>          |   | x |   |
| Pin-Tailed Whydah             | <i>Vidua macroura</i>            |   | x |   |
